# Supplementary material
Source: Springer Nature journal article supplement (https://www.springermedizin.de/resource/supplementary/12936_2011_1772_MOESM6_ESM.pdf/9541700)

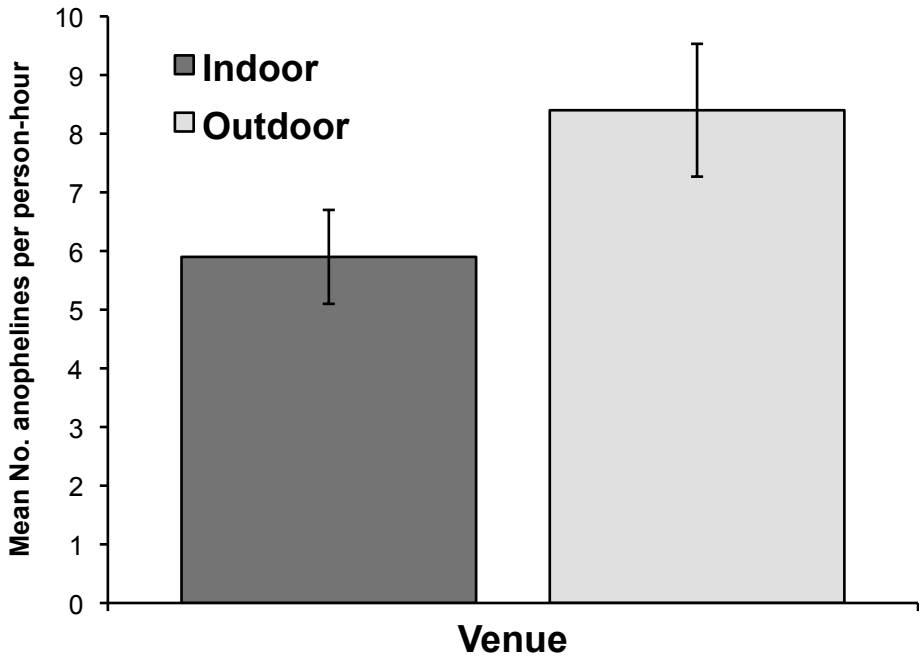

Supplement: MOESM6 [file 9541700]
